# Supplementary material for: Fragmentation of methyl hydrogen α-hydroxyiminobenzylphosphonates — kinetics, mechanism and the question of metaphosphate formation †
Source: Royal Society of Chemistry journal article supplement (doi:10.1039/b002267p), 2000-01-01
Supplement: b002267p.doc [file b002267p.doc]

# Supplementary data

**Fragmentation of Methyl Hydrogen -Hydroxyiminophosphonates - Kinetics, Mechanism and the Question of Metaphosphate Formation**

Jehoshua Katzhendler,*# Hava Schneider, Rachel Ta-Shma, and Eli Breuer*#

Department of Medicinal Chemistry, The School of Pharmacy, The Hebrew University of Jerusalem, P. O. Box 12065, Jerusalem, 91120 Israel

Table S1 Rate constants for the fragmentation of substituted (*E*)- -hydroxyiminobenzyl phosphonates, (*E*)-**1a-e** and of methyl (*E*)--methoxyiminobenzylphosphonate (*E*)-**1f** at various pH’s. t = 30 C

|  | | X = H (*E*)-**1a** | X = OCH3  (*E*)-**1b** | | | | X = CH3  (*E*)-**1c** | | | X = Cl  (*E*)-**1d** | X = CF3  (*E*)-**1e** | | | | X = H  (*E*)-**1f** |
| --- | --- | --- | --- | --- | --- | --- | --- | --- | --- | --- | --- | --- | --- | --- | --- |
| [H+] | pH | kobsmin-1  kcalcda min-1 | | kobsmin-1  kcalcdb min-1 | kobs min-1  kcalcdc min-1 | | | kobsmin-1  kcalcdd min-1 | | | | kobs min‑1  kcalcde min-1 | kobs min-1  kcalcdf min-1 | | |
| 1.0 | 0.0 | 1.14E-2  1.13 E-2 | | 2.93E-2  3.20 E-2 | | 2.44E-2  2.52E-2 | | | 6.16E-3  6.41 E-3 | | | 4.13E-3  4.36E-3 | | 1.89E-3  2.15E-3 | |
| 0.75 | 0.125 | 8.62E-3  8.70E-2 | | 2.43E-2  2.46E-2 | | 1.96E-2  1.93E-2 | | | 5.03E-3  4.95E-3 | | | 3.13E-3  3.39E-3 | | 1.62E-3  1.70E-3 | |
| 0.5 | 0.301 | 5.67E-3  6.08 E-3 | | 1.84E-2  1.71E-2 | | 1.35E-2  1.33E-2 | | | 3.30E-3  3.49E-3 | | | 2.79E-3  2.42E-3 | | 1.34E-3  1.25E-3 | |
| 0.25 | 0.602 | 3.62E-3  3.44 E-3 | | 1.10E-2  9.63E-3 | | 7.15E-3  7.41E-3 | | | 2.33E-3  2.02E-3 | | | 1.68E-3  1.44E-3 | | 9.55E-4  8.05E-4 | |
| 0.1 | 1.0 | 2.36E-3  1.83 E-3 | | 6.68E-3  5.05E-3 | | 4.46E-3  3.79E-3 | | | 1.39E-3  1.11E-3 | | | 9.30E-4  8.33E-4 | | 3.62E-4  5.19E-4 | |
| 0.7585E-1 | 1.12 | 1.81E-3  1.55 E-3 | | 5.89E-3  4.27E-3 | | 3.49E-3  3.18E-3 | | | 1.08E-3  9.57E-4 | | | 9.13E-4 7.27E-4 | | 2.99E-4  4.67E-4 | |
| 0.3460E-1 | 1.46 | 0.92E-3  1.03 E-3 | | 2.72E-3  2.80E-3 | | 2.49E-3  2.03E-3 | | | 7.13E-4  6.53E-4 | | |  | |  | |
| 0.1258E-1 | 1.90 | 4.50E-4  6.11E-4 | | 1.26E-3  1.64E-3 | | 9.26E-4  1.17E-3 | | | 3.17E-4  3.98E-4 | | | 2.19E-4  3.22E-4 | | 1.80E-4  2.32E-4 | |
| 0.6760E-2 | 2.17 | 5.17E-4  4.18E-4  2.49E-4  3.32E-4  2.00E-4  2.30E-4  1.30E-4 | | 8.57E-4  1.12 E-3 | | 6.80E-4  7.93E-4 | | | 1.95E-4  2.74E-4 | | |  | |  | |
| 0.5012E-2 | 2.30 | 2.49E-4  3.40E-4 | | 6.60E-4  9.10E-4 | | 5.05E-4  6.43E-4 | | | 1.50E-4  2.24E-4 | | | 1.29E-4  1.83E-4 | | 9.84E-5  1.34E-4 | |
| 0.3160E-2 | 2.50 | 2.40E-4  2.40E-4 | | 4.83E-4  6.41E-4 | | 4.01E-4  4.52E-4 | | | 1.65E-4  1.58E-4 | | |  | |  | |
| 0.220E-2 | 2.65 | 1.80E-4  1.78E-4 | | 3.89E-4  4.76E-4 | | 3.22E-4  3.35E-4 | | | 1.28E-4  1.18E-4 | | |  | |  | |
| 0.1250E-2 | 2.90 | 1.16E-4  1.09E-4 | | 2.74E-4  2.90E-4 | | 2.18E-4  2.04E-4 | | | 9.65E-5  7.20E-5 | | |  | |  | |
| 0.7940E-3 | 3.10 | 1.13E-4  7.16E-5 | | 2.50E-4  1.91E-4 | | 1.76E-4  1.34E-4 | | | 7.16E-5  4.75E-5 | | |  | |  | |

Correlation: a = 0.989, b = 0.997, c = 0.995, d = 0.993, e = 0.994, f = 0.996.

Calculated values were derived from Equation 1.

Table S2 Rate constants for the fragmentation of (*E*)-**1a** and (*E*)-**1b** in various aqueous acidic solutions and of (*E*)-**1a** in D2O, t = 50 oC.

|  | | | X = H (*E*)-**1a** | | X = OCH3  (*E*)-**1b** | X =H (D2O)  (*E*)-**1a** | | |
| --- | --- | --- | --- | --- | --- | --- | --- | --- |
| [H+] | pH(D) | kobsmin.-1  kcalcda | | kobsmin.-1  kcalcdb | | | | kobsmin.-1  kcalcdc,d |
| 1.0 | 0.0 | 1.02E-1  1.15E-1 | | 3.03E-1(i)  3.00E-1 | | | 1.80E-1  1.98E-1 | |
| 0.75 | 0.125 | 8,30E-2  8.72E-2 | | 2.22E-1  2.32E-1 | | | 1.66E-1  1.53E-1 | |
| 0.5 | 0.301 | 7.19E-2  6.29E-2 | | 1.62E-1  1.64E-1 | | | 1.07E-1  1.09E-1 | |
| 0.25 | 0.602 | 5.12E-2  3.83E-2 | | 1.03E-1  9.56E-2 | | | 7.65E-2  6.49E-2 | |
| 0.1 | 1.0 | 2.63E-2  2.30E-2 | | 6.40E-2  5.34E-2 | | | 4.53E-2  3.78E-2 | |
| 0.1258E-1 | 1.90 | 7.14E-3  9.43E-2 | | 1.53E-2  1.95E-2 | | |  | |
| 0.5012E-2 | 2.30 | 3.90E-3  5.40E-3 | | 1.02E-2  1.10E-2 | | | 7.24E-3(ii)  1.02E-2 | |
| 0.220E-2 | 2.65 |  | | 6.08E-3  5.81E-3 | | | 5.10E-3(iii)  6.49E-3 | |
| 0.794E-3 | 3.10 | 8.70E-4  1.16E-3 | |  | | |  | |

(i)1.74E -2 at 22 oC (ii) pD = 2.39; (iii) pD = 2.69 Correlation: a = 0.994; b = 0.989; c = 0.992; d, applying, pKDa1 = 2.3

Table S3 Rate constants k1 and k2 , and estimated valuesC of k’1 , k2Z , pKa2, pK± of the various methyl hydrogen (*E*)--hydroxyiminobenzylphosphonates (*E*)-**1a-e** in H2O and D2O and of methyl hydrogen (*E*)--methoxyiminobenzylphosphonate (*E*)-**1f**, determined according to equation 1 at 30 oC and 50 oC.a Ka1 was taken as 0.01M-1

| X | k1x102  min-1M-1 | k2x104  min-1 | pKa2 | k’1 min-1 | pK± | k2Z min-1 |
| --- | --- | --- | --- | --- | --- | --- |
| H  (*E*)-**1a** | 1.046  9.69a | 9.66  157a | -1.74 | 0.57  5.32a | -2.32 | 0.201 |
| OCH3  (*E*)-**1b** | 2.976  27.14a | 25.77  316a | -1.52 | 0.98  8.98a | -2.09 | 0.317 |
| CH3  (*E*)-**1c** | 2.36 | 18.0 | -1.60 | 0.94 | -2.17 | 0.27 |
| Cl  (*E*)-**1d** | 0.5833 | 6.41 | -1.94 | 0.50 | -2.51 | 0.207 |
| CF3  (*E*)-**1e** | 0.3878 | 5.29 | -2.21 | 0.63 | -2.78 | 0.318 |
| H  (*E*)-**2f** | 0.1778 | 3.92 |  |  |  |  |
| H  (*E*)-**1a**  in D2O | 17.66a,b | 220a,b |  |  |  |  |

a. 50 oC, b. Ka1(D2O) is 0.005, c. See appendix.

Table S4 Results from monitoring the fragmentation of (*E*)-**1a** and of (*E*)-**1a +** (*Z*)-**1a** mixture in 0.5 M cacodylate buffer pH = 6.21 at 25 oC by 31P NMR spectroscopy.

| (*E*)-**1a** | | | | (*E*)-**1a** + (*Z*)-**1a** (55%:45%) | | | |
| --- | --- | --- | --- | --- | --- | --- | --- |
| time  days | % (*E*)-**1a**  (6.4 ppm) | % *(Z*)-**1a**  (2.1 ppm) | % **2**  (3.2 ppm) | | % (*E*)-**1a**  (6.4 ppm) | % (*Z*)-**1a**  (2.1 ppm) | % **2**  (3.2 ppm) |
| 0 | 100 | 0 | 0 | | 55 | 45 | 0 |
| 9 | 89 | 0 | 11 | | 57 | 40 | 2 |
| 16 | 85 | 2 | 13 | | 58 | 37 | 5 |
| 20 | 82 | 3 | 15 | | 59 | 35 | 6 |
| 38 | 74 | 5 | 21 | | 60a | 30a | 10a |
| 42 | 71 | 6 | 23 | | 59 | 28 | 13 |
| 52 | 67 | 7 | 26 | | 60 | 25 | 15 |
| 71 | 63 | 8 | 29 | | 59 | 21 | 20 |
| 87 | 57 | 9 | 34 | | 57 | 18 | 25 |
| 128 | 49 | 9 | 42 | | 53 | 14 | 33 |
| 141 | 43 | 10 | 47 | | 48 | 13 | 39 |

| 164 | 39 | 9 | 50 | 45 | 12 | 43 |
| --- | --- | --- | --- | --- | --- | --- |
| 309 | 19 | 5 | 76 | 20 | 6 | 74 |

a. 30 days

Table S5: kobs values obtained in the fragmentation of (*E*)-**1a** in various binary alcohol-water mixtures and acidities.

| ROH | t C | % ROHa | [HCl], M | 103x kobs, min-1 |
| --- | --- | --- | --- | --- |
| MeOH | 30 | 90 | 1 | 12 |
| EtOH | 30 | 90 | 1 | 10.8±0.5b |
| EtOH | 30 | 95 | 0.5 | 9.98 |
| EtOH | 30 | 99 | 0.1 | 9.05 |
| EtOH | 25 | 99 | 0.1 | 6.42c |
| EtOH | 25 | 80 | 0.045 | 7.2 |
| EtOH | 25 | 90 | 0.045 | 7.8 |
| EtOH | 25 | 99 | 0.045 | 7.44 |
| IPA | 30 | 90 | 1 | 11.4 |
| IPA | 30 | 99 | 0.1 | 9.95 |
| TBA | 30 | 90 | 1 | 11.8 |

1. Vol/vol percents.
2. An average of two determinations. The reaction rate remained practically the same when the EtOH percentage was gradually lowered to zero.

c. Practically the same value was found in 50-99% EtOH (see table S6).

Table S6 kobs values obtained in the fragmentation of (*E*)-**1a** in 2,2,2-trifluoroethanol-water and ethanol-water

| % ROHa | 103 x kobs min-1 | | | |
| --- | --- | --- | --- | --- |
|  | TFE-W 30 C | | | EtOH-W 25 C |
|  | 1 M HCl | 0.1 M HCl | 0.1 M HCl | |
| 0 | 11.3 | 3.12 | 2.58 | |
| 10 | 13.5 |  | 2.70 | |
| 20 | 16.2 |  | 4.18 | |
| 30 | 16.2 |  | 5.03 | |
| 40 | 17.7 |  | 5.47 | |
| 50 | 19.9 | 7.62 | 6.64 | |
| 60 | 22.3 |  |  | |
| 70 | 27.0 | 15.1 | 6.78 | |
| 80 | 35.8 |  |  | |
| 90 | 48.0 | 26.1 | 6.51 | |
| 99 |  |  | 6.42 | |

1. Vol/vol percents.

Figure S1 - Repetitive UV spectra showing the disappearance of methyl hydrogen (*E*)--hydroxyiminobenzylphosphonate [(*E*)-**1a**] at  = 240-270 nm and the emergence of benzonitrile at  = 215-240 nm in 1M HCl.

Figure S2 - pH-rate profiles for the hydrolysis *p*-substituted of methyl hydrogen -hydroxyiminobenzylphosphonates at 50 oC. (*E*)-**1a** (X = H, R = H) - -; (*E*)-**1b** (X = OMe, R = H) -- ; (*E*)-**1a** (X = H, R = H) in D2O -**x**-.

Figure S3 - log kobs for the fragmentation of (*E*)-**1a** in (a) TFE-W, 1M HCl, 30 oC (b) TFE-W, 0.1M HCl, 30 oC and (c) EtOH-W, 0.1M HCl, 25 oC against, (A) Grunwald-Winstein Y values, m(corr.) are; (a)=-0.23(0.9352), (b)=-0.38(0.9630), (c)=-0.22(0.9338). (B) Schadt, Bentley and Schleyer YAdOTs values, m(corr.) are; (a)= -1.5(0.9689), (b)=-2.3(0.9995), (c)=-0.15(0.9438). Y and YAdOTs values were taken or interpolated from litrature (T. W. Bentley; G. Llewellyn *Progress in* *Phys. Org. Chem.* **1990**, *17* 121.).YAdTs values in TFE-W are above 40% TFE.

APPENDIX - ESTIMATION OF THE pKa VALUES IN -HYDROXYIMINOPHOSPHONATES.[[1]](#endnote-2)

Scheme 1 shows in an abbreviated way the various ionizations of -hydroxyiminophosphonates and the Ka’s assigned to them.

The Hammett plots of the pKa values[[2]](#endnote-3) of three *(E,Z)* pairs of benzaldoximes (**I**, **II** and **III**) against the sums of  values of the aryl groups are shown in Figure 1. These plots yield equations 1 and 2 for (*Z)* and *(E)* oximes, respectively.

**I** Ph(H)C=NOH;

**II** *p*-Cl-C6H4(H)C=NOH;

**III** *p*-O2N-C6H4(H)C=NOH

pKa*Z* = 11.039-0.852p  (N = 3) Corr. = 0.990)……………….(1)

pKa*E* = 11.83-0.199p (N = 3) Corr. = 0.725)… …… (2)

Figure 2 shows the plots of the pKa values[[3]](#endnote-4),[[4]](#endnote-5) of a series of six oximes of defined stereochemistry (*Z*-**IV**, *E*-**V**, **VI**, *E*-**VII**, *E*-**VIII** and ***E*-IX**, against the sums of the * values[[5]](#endnote-6) of the groups attached to the C=N carbon. This plot yields equation 3.

pKa = 12.876-1.239* (N = 6; Corr. 0.961)……………………… (3)

Equation 3 yields the pKa value of 8.90 for (*E*)-Ph(CF3)C=NOH. On the other hand, the pKa value of the (*Z*)- isomer was found to be 9.23.Error: Reference source not found Utilizing the value of pKa = 8.90 for (*E*)-Ph(CF3)C=NOH results in equation 4 for the (*E)*-*p*-substituted ,,-trifluoroacetophenone oxime series.

pKa*Z* = 8.90-0.852p ……………………………………(4)

Since the * value of P(O)(OEt)2 was found to be equal to that of CF3,[[6]](#endnote-7) equation 4 thus provides the means to predict the pKa values of *p*-substituted methyl hydrogen (*E*)--hydroxyiminobenzylphosphonates [(*E*)-**1**]from the Hammett correlation. The calculated pKa5 values of: (*E*)-**1a**, (*E*)-**1b**, (*E*)-**1c**, (*E*)-**1d**, (*E*)-**1e**, are 8.90, 9.06, 8.97, 8.64, 8.37, respectively.

Figure 3 shows the plots of the pKa values of a series of oximes (some of them of undefined stereochemistry) listed in Table 1, plotted against the sums of the * values of the groups attached to the C=N carbon. In addition to the above, we have also calculated the pKa value of Ph(CF3)C=NOH via **-*correlation of oximes of mixed stereochemistry *(Z, E)* and of not-defined stereochemistry (n.d.) ) as shown in equation 5

pKa = 12.416-1.025* (N=20; Corr. = 0.935) ……………….. (5)

According to equation 5, the pKa of Ph(CF3)C=NOH and therefore, of Ph(P(O)(OMe)OH)C=NOH is calculated to be 9.12. Applying this value to equation 1 results in pKa5 values of 9.28, 9.19, 8.85, 8.59 for (*E*)-**1b**, (*E*)-**1c**, (*E*)-**1d**, (*E*)-**1e,** respectively. These are not very different from the values obtained above.

The pKa2 value of protonated (*E*)-**1a**, was derived from equation 6.

pKa2 = 1.54 - 1.025* …………………………… ………(6)

Equation 6 was derived from equation 5 by adjusting the intercept of the latter equation to a value of 1.54 which was quoted as the pKa2 of (Me)2C=N+HOH[[7]](#endnote-8)The * parameter in equation 6 is assumed to be similar to that of the non-protonated system (equation 5).

The respective pKa2 value of the N-protonated form of (*E*)-**1a** according to equation 6 is –1.74. To estimate the pKa2 values of (*E*)-**1b**, (*E*)-**1c**, (*E*)-**1d**, (*E*)-**1e** equation 4 was transformed to 7 by utilizing equation 1 or 4.

pKa2 = -1.74 - 0.852p …………………………(7)

Thus, the corresponding values of (*E*)-**1b**, (*E*)-**1c**, (*E*)-**1d**, (*E*)-**1e** are: -1.52, -1.60, -1.94, -2.21.

The dissociation constants pKa3 of the zwitterionic species **7** to form the anionic structure **5** (Scheme 1) can also be estimated by the following consideration. The difference in the pKa values of the first and the second ionization constants of succinic acid was found to be 1.43 (4.20 for the diacid and 5.63 for the monoacid anion).[[8]](#endnote-9) Accordingly, this difference in pKa, yields pKa3 values for (*E*)-**1a**, (*E*)-**1b**, (*E*)-**1c**, (*E*)-**1d**, (*E*)-**1e** of –0.32, -0.09, -0.17, -0.51 and –0.78, respectively.

pKa4 is of the ionization of the cationic form *p*-X-PhC=NOH2+(HO-P=O) (OMe) to the zwitterionic form *p*-X-PhC=NOH2**+**(**-**O-P=O)(OMe). This value can be derived from the following relationship: pKa1 + pKa2 - pKa3 = pKa4. For (*E*)-**1a**, (*E*)-**1b**, (*E*)-**1c**, (*E*)-**1d**, and (*E*)-**1e,** where pKa1 = 2.0 for all compounds, the pKa4 value of 0.57 was obtained for all compounds. The difference of 1.43 units between the pka1 and pKa4 seems reasonable in view of similar values reported in the literature. Thus, pKa of -oxoaldoximate of the structures (Me)2S+CH2C(O)CH=NOH and MeSCH2C(O)CH=NOH is 1.62,[[9]](#endnote-10) and that of the protonated and unprotonated glycine hydroxamic acid pair, NH3+CH2C(O)NHOH and NH2CH2C(O)NHOH is 2.0.[[10]](#endnote-11)

The value of pK for the internal proton jump from the zwitterionto theneutral species can be calculated from the following relationship: pK = pKa2 - pKa4. For compounds (*E*)-**1a**, (*E*)-**1b**, (*E*)-**1c**, (*E*)-**1d**, (*E*)-**1e** the corresponding values are –2.32, -2.09, -2.17, -2.51, and –2.78.

Figure 1 Hammett correlation of *E* and *Z* isomers of three benzaldoximes

Figure 2 Hammett correlation of pKa values and * values of six oximes of known structure.

Figure 3 Hammett correlation of pKa values and * values of oximes of mixed structure

| Table 1 Relationship between * and pKa values of various (*E*) and (*Z*)-oximes and of undetermined (n.d.) stereochemistry | | | | |
| --- | --- | --- | --- | --- |
|  | | | | |
| Oxime: | R1 | R2 | pKa | * |
| (*Z*)-**I** | Ph | H | 11.02Error: Reference source not found | 1.1 |
| **I** **n.d.** | Ph | H | 10.86Error: Reference source not found | 1.09 |
| **IV** **n.d.** | Ph | Me | 11.58[[11]](#endnote-12) | 0.6 |
| **IV** **n.d.** | Ph | Me | 11.41Error: Reference source not found | 0.6 |
| (*Z*)-**IV** | Ph | Me | 12.35Error: Reference source not found | 0.6 |
| (*E*)-**IV** | Ph | Me | 11.80Error: Reference source not found | 0.6 |
| (*E*)-**V** | Me | H | 11.69Error: Reference source not found | 0.49 |
| (*Z*)-**V** | Me | H | 12.39Error: Reference source not found | 0.49 |
| **VI** | Ph | Ph | 11.53Error: Reference source not found | 1.2 |
| **VI** | Ph | Ph | 10.7Error: Reference source not found | 1.2 |
| (*Z*)-**VII** | Et | Me | 11.98Error: Reference source not found | 1.56 |
| (*E*)-**VII** | Et | Me | 11.48Error: Reference source not found | 1.56 |
| (*E*)-**VIII** | CF3 | Me | 9.76Error: Reference source not found | 2.61 |
| (*E*)-**IX** | CF3 | H | 8.75Error: Reference source not found | 3.0 |
| **X n.d.** | t-Bu | Me | 12.43Error: Reference source not found | -0.3 |
| **XI n.d.** | Iso-Prop | Me | 12.64Error: Reference source not found | -0.2 |
| **XII** | Me | Me | 12.6Error: Reference source not found | 0 |
| **XII** | Me | Me | 12.42Error: Reference source not found | 0 |
| **XIII** **n.d.** | CCl3 | H | 9.26Error: Reference source not found | 3.14 |
| (*E*)-**XIV** | CF3 | Ph | 8.86Error: Reference source not found | 3.1 |

**Table 2 - Calculated pKa values for the different species derived from substituted methyl hydrogen -hydroxyiminobenzylphosphonates.**

| Oxime | pKa2 | pKa4 | pKa1 | pKa5 | pKa3 | Proton Jump |
| --- | --- | --- | --- | --- | --- | --- |
| (*E*)-**1a** | -1.74 | 0.57 | 2.0 | 8.90 (9.12)a | -0.32 | -2.32 |
| (*E*)-**1b** | -1.52 | 0.57 | 2.0 | 9.06 (9.28) a | -0.09 | -2.09 |
| (*E*)-**1c** | -1.6 | 0.57 | 2.0 | 8.97 (9.19) a | -0.17 | -2.17 |
| (*E*)-**1d** | -1.94 | 0.57 | 2.0 | 8.64 (8.85) a | -0.51 | -2.51 |
| (*E*)-**1e** | -2.21 | 0.57 | 2.0 | 8.37 (8.59) a | -0.78 | -2.78 |

a. The numbers in parentheses were calculated from the pKa value deduced from equation 5 for ,,-trifluoroacetophenone oxime of undetermined stereochemistry.

1. [?] The numbering of equations, tables and figures in this appendix is separate and independent from those in the main body of the paper. Compounds used for calculating the pK values that appear in this appendix (but not in the main body of the paper) are numbered by Roman numerals. Compounds numbered by Arabic also appear in the paper. [↑](#endnote-ref-2)
2. [?] A. Raoult, M. Vilkas, *Bull. Soc. Chim. France* **1968**, 3315-3320. [↑](#endnote-ref-3)
3. [?] A. P. Kurtz, T. D. J. D’Silva, *J. Pharm. Sci*. **1987**, *76*, 599-610. [↑](#endnote-ref-4)
4. [?] G. Guillot-Edelheit, M. Laloi-Diard, O. Eisenstein, *Tetrahedron,* **1978**, *34*, 523-527. [↑](#endnote-ref-5)
5. [?] For * values see: T. Fujita, T. Nishioka, The analysis of the ortho effect, in *Prog. Phys. Org. Chem*. (Ed.: R. W. Taft, Jr.), **1976**, *12*, 49-89. [↑](#endnote-ref-6)
6. [?] J. Katzhendler, I. Ringel, R. Karaman, H. Zaher, E. Breuer, *J. Chem. Soc. Perkin Trans. 2* **1997**, 341-9. [↑](#endnote-ref-7)
7. [?] J. Hine, R. C. Dempsey, R. A. Evangelista, E. T. Jervi, J. M. Wilson, *J. Org. Chem*. **1977**, *42,* 1593. [↑](#endnote-ref-8)
8. [?] A. Albert, E. P. Serjeant, *The determination of Ionisation Constants. A Laboratory Manual*, 3rd ed., Chapman and Hall, London, 1984. [↑](#endnote-ref-9)
9. [?] F. Degorre, D. Kiffer, F. Terrier, *J. Med. Chem*. **1988**, *31*, 757-763. [↑](#endnote-ref-10)
10. [?] E. J. Behrman, M. J. Biallas, H. J. Brass, J. O. Edwards, M. Isaks, *J. Org. Chem*. **1970**, *35*, 3069. [↑](#endnote-ref-11)
11. [?] F. Terrier, F. Degorre, D. Kiffer, M. Laloi, *Bull. Soc. Chim. France* **1988,** 415-419. [↑](#endnote-ref-12)
